# Supplementary material for: Investigation of Antimicrobial Peptide Genes Associated with Fungus and Insect Resistance in Maize
Source: MDPI journal article supplement (doi:10.3390/ijms18091938), 2017-09-15
Supplement: s1 [file s1]

>GRMZM2G368890

MWTIRKVATPQVAVLLLLLIVVAQEAAPLAEARVCRRRSAGFKGVCMSDHNCAQVCLQEG  
YGGGNCDGIMRQCKCIREC

>GRMZM2G368861P1

MELIKSRATVCALLALLLLSHYDGGTTTTMVAEARVCMGKSQHHSFPCISDR LCSNECV  
KEDGGWTAGYCHLRYC RCQKAC

>GRMZM2G368861P2

MELIKSRATVCALLALLLLSRNKKKHTDLFVDLIHVLFLISAASWTLPPSAIHAQTTTA  
GRRRRWWRP GCAWARASTTRSPASPTASAATSASRRTAGGPPATATSATAGARRRAKQSS

>GRMZM2G046532

MGGLSTKLFVLLLLVCYTGTQGGPVTMVSARKCESQSFRFKGPCSRDANCANVCLTEGF  
TGGVCKGLRHRCFCTRDC

>GRMZM2G392863P1

MELSRKLFTAVLLVMLLLLSAEVGPVAVAEARTCQSQSHRFRGPCLRRSNCANVCRTEGF  
PGGRCRGFRRRCFCTTHCH

>GRMZM2G392863P2

MLLRAAA EVGPVAVAEARTCQSQSHRFRGPCLRRSNCANVCRTEGFPGGRCRGFRRRCFC  
TTHCH

>GRMZM2G146809

MAWTSRRMVASALVFLMLLAASEMGTTTRVAEARHCTSQSHRFVGACMSKSN CENVCRTE  
GFPWGE CRWHGIERKCHKRIC

>GRMZM5G896902

MWRRRRGNARRTASDSLGHAWRRTTAPTCAAVRASPAAGAAPSAAAASALSRAKLTYSRQ  
FDGGRLFYLLAYLIFSPLTIRKRTCWHVRCVVYAFLAGFIC

>GRMZM2G153488P1

MALSRRMAAPVLVLMLLLVATELGTTKVAEARHCLSQSHRFKGLCmssNNCANVCQTENF  
PGGECKAEGATRKCFCKKIC

>GRMZM2G153488P2

MSSNNCANVCQTENFPGGECKAEGATRKCFCKKIC

>GRMZM2G153488P3

MSSNNCANVCQTENFPGGECKAEGATRKCFCKKIC

>GRMZM2G064698P1

MESSRRFQPAVILLLLIVSTDMAQARECEKYSERFVGACMIADNCANVCRGEGFLAGRC  
STFRRRCICTRQC

>GRMZM2G064698P2

MTNVMYVLVTVMYILMTVMYLVHVCSRFIILFMY

>GRMZM2G153368P1

MAAVSQGAVLFLFLLLVAAEVGTIDAKMGVAMPMHALIMENVKQQEKEKEKEEKSTEK  
EESRCLSQSLQFEGFCFNSDRCAEVCMKESFPGGECKRDVAMRKCFCKKPC

>GRMZM2G153368P2

MVHAEVGTIDAKMGVAMPMHALIMENVKQQEKEKEKEEKSTEKEESRCLSQSLQFEGF  
CFNSDRCAEVCMKESFPGGCKRDVAMRKCFCKKPC

>GRMZM2G005633P1

MAMAKAGAPRVSAAQLVTLGLSLLCAVAGPAAQNCGCQPNVCCSKFGYCGTTDEYCGDG  
CQSGPCRSGGGGSSGGGGANVASVVTGSFFNGIKSQAGSGCEGKNFYTRSAFLSAVKAYP  
GFAHGGSQVQGKREIAAFFAHATHETGRKLALSINLALQRGAGSLIFDPSC

>GRMZM2G005633P2

MAMAKAGAPRVSAAQLVTLGLSLLCAVAGPAAQNCGCQPNVCCSKFGYCGTTDEYCGDG  
CQSGPCRSGGGGSSGGGGANVASVVTGSFFNGIKSQAGSGCEGKNFYTRSAFLSAVKAYP  
GFAHGGSQVQGKREIAAFFAHATHETGHFCYISEINKSNAYCDPTKRQWPCAAGQKYYGR  
GPLQISWNYNYGPAGRAIGFDGLGDPGRVARDAVVAFKAALWFWMNSVHGVVPQGFATT  
RAINGALECGGNNPAQMNRVGYRQYCRQLGVDPGPNLTC

>GRMZM2G373106

MANSATPPPTMILTAALGLTFLLCATTPTAAQHCGCQPGFCCSKYGYCGKTSAYCGEGCK  
SGPCWGSAGCGGGGASVARVVTKSFFNGIKSHAGSWCEGRRFYTRSAFLEAIAAYPGFAH  
GGSEVERKREIAAFFAHVTHETGHLCYINEVDVAKYCDWSSEKQWPCHPRQGYGRGPLQ  
LSWNYNYGPAGRSLGFDGLGDPDRLAQDPVLSFKSALWYWMENMHQLMPQGFATIRAIN  
GFDECHGGKNTAEMKDRVRFYLEYCHHFRVHPGLDLSC

>GRMZM2G117942

MAGMTVGNNKLALAAVLLCAAAAMATAQQASGVRATYNFYNPQQNNWDLNAVSAWCATWDA  
SKPLSWRMKYGWTAFCGPAGPTGQAACGQCCLVTNTATGASITVRIVDQCSNGGLDLDD  
TAFKPIDTNGQGFGAGHLTVNYQFVNCGDN

>GRMZM2G145518

MHVIDLSIHASIEMYIYPGSRSHRDHRTRASSLLPMAMTRALAMVAMLATAALFFMSARA  
QQCGTQAGGALCPDCLCCSQWGYCGSTPDYCTDGCQSQCFCGSGCGGGGGTPATPPSGPVS  
EIISESLFNEMLLHRNDVACPAIGFYTYDAFIAAANAFPGFGTTGGADTQKRELAFLAQ  
TSHETTGGWDTAPDGPYTWGYCFKEEVGGVWGPDYCQSPQWPCADGQKYYGRGPIQLSW

NYNYGPAGEAIGQDLLGNPGLVAADATVSFETALWYWMTPQPPKPSCHDVITGQWAPSPA  
DVAAGRLPGYGVLTNIINGGLECGHGADARVASRIGFYKRYCDMFGLSYGDNLDQSP  
FGNTILSTTNNTTSYHVDA

>GRMZM2G051921

MVMAMANSATILTVVLALIGLALLRAAAPASQNDGSCPPGYCCSKFGYCGTSFDYCNG  
NTCQSGPCTAGGAGSGGANVSGVVTDAFLSGIKSQAGSGCEGSSLSFYSRRFLSAASSY  
PGFARAGSEADGKRELAFFAHVTHETGHFCYVSEVNKNNSYCNSNTQWPCAPGKKYYG  
RGPLQVSWNYNYGPAGRSVGFGLGNPDMVAQDPVVSFKTALWFWMSNAHQVMPRGFGAT  
IRAINGALECNGENPAAVNARVGYYKEYCEQFGVGPGNNLTC

>GRMZM2G051943

MANAPRILALGLLALLCAAAGPAAAQNCGCQPNFCCSKFGYCGTTDAYCGDGCQSGPCRS  
GGGGGGGGGGGGGGSGGANVANVVTDAFFNGIKNQAGSGCEGKNFYTRSAFLSAVNAYPG  
FAHGGTEVEGKREIAFFAHVTHETGHFCYISEINKSNAYCDASNRQWPCAAGQKYYGRG  
PLQISWNYNYGPAGRDIGFENGLADPNRVAQDAVIAFKTALWFWMNNVHRVMPQGFGATIR  
AINGALECNGNPAQMNAARVGYYKQYCQQLRVDPGPNLTC

>GRMZM2G117971

MAGMRVGKLALAAVLLCAAAAMATAQQASGVRATYNFYNPQQNNWDLNAVSAYCATWDAS  
KPLSWRMKYGWTAFCGPAGPTGQAACGQCLLVNTATGASITVRIVDQCSNGGLDLDYDT  
AFKPIDTNGQGFQAGHLTVNYQFVNCGDN

>GRMZM2G010868P1

MARTQSAVAVAVVAAVLLAAAATTSEAAITCGQVSSAIAPCLSYARGTGSGPSASCCSG  
VRNLKSAASTAADRRACNCLKNAARGVSGLNAGNAASIPSKCGVSIPYTISTSTDCSRVN

>GRMZM2G010868P2

MARTQSAVAVAVVAAVLLAAAATTSEAAITCGQVSSAIAPCLSYARGTGSGPSASCCSG  
VRNLKSAASTAADRRACNCLKNAARGVSGLNAGNAASIPSKCGVSIPYTISTSTDCSR

>GRMZM2G101958

MARMQKLAVATAAVVALVLLAAAATSEAAISCGQVASAIAPCISYARGQGSGPSAGCCSG  
VKSLNNAARTTADRRACNCLKNAAAGVSGLNAGNAASIPSKCGVSIPYTISTSTDCSRVN

>GRMZM5G898755P1

MAARSSSSQPQLVAAA AVLAAALLLAAGAGTASAAVSCGEVTSSVAPCLGYAMGSAASP  
SAACCSGVRSLNSRASSTADRQATCNCLKSMTGRLGGGVSMANANIPSKCGVSVGVPI  
PTVDCTKIN

>GRMZM5G898755P2

MAARSSSSQPQLVAAA AVLAAALLLAAGAGTASAAVSCGEVTSSVAPCLGYAMGSAASP  
SAACCSGVRSLNSRASSTADRQATCNCLKSMTGRLGGGVSMANANIPSKCGVSVGVPI  
PTVDCTKYVGPVPAVPCMSS

>GRMZM2G107839P1

MAAVLNSRKTPQAVVAVLVAAALLASSASAAITCGQVGSSLAPCIPYATGRASALPASCC  
SGVKSLNSAARTSADRQAACRCLKSLANSVKSVNMGT VATIPGKCGVSVGFPISMSTDCN  
KYVIQLACLFVIIHAYAYASPSFIFSILLGHACRIS

>GRMZM2G107839P2

MAAVLNSRKTPQAVVAVLVAAALLASSASAAITCGQVGSSLAPCIPYATGRASALPASCC  
SGVKSLNSAARTSADRQAACRCLKSLANSVKSVNMGT VATIPGKCGVSVGFPISMSTDCNKIS

>GRMZM2G105364

MVTKVICFLVLASVLLAVAFPVSA LRQQVKKGGGGEGGGGSGSGGGNLNPWECSPKC  
GSRCSKTQYRKACLTLCNKCCAKCLCVPPGFYGNKGACPCYNNWKTKEGGPKCP

>GRMZM2G068202

MAAASGRAPSACALLLLFLLL VVGAAAAVIVVDANRGEQEQDWDWEQLSAASPSWSPA  
PAPAPSPVSFIDCGSACGARCALSSRWNL CRRACGCCARCNCVPPGTAGNH DVCPCYAA  
ITTRGGRPKCP

>GRMZM2G117940

MAQASSFSIVLLFLALVLVVEVSAGTANEELYRPAGAEGSVPIEQCPEKCDYRCSATSY  
KKPCLFFCNYYCCNKCLCVPSGT YGNKEECPCYDNMKTQGGPKCP

>GRMZM2G172596

MASRNKAAALLCFLFLA AAVAASAAEMIAGSGIGDGEGEELDKGGGGGGGHHKHEGYKNK  
DGKGNLKPSQCGGECRRRCSKTHHKKPCLFFCNKCCAKCLCVPPGT YGNKETCPCYNNWK  
TKKGGPKCP

>GRMZM2G062527P1

MESKSPWSLRLICCAAMVAIALLPQQGGQAACFVPTPGPAPAPPGSSATNTNASSAAPR  
PAKPSAFPPPMVSEYYR

>GRMZM2G062527P2

MESKSPWSLRLICCAAMVAIALLPQQGGQAACFVPTPGPAPAPPGSSATNTNASSAAPR  
PAKPSAFPPPMYGGVTPGTGSLQPHECGGRCAERCSATAYQKPCLFFCRKCCAACLCVPP  
GTYGNKNTCPCYNNWKT KRGGPKCP

>GRMZM2G062527P3

MESKSPWSLRLLICCAAMVAIALLPQGGQAACFVPTPGPAPAPPGSSATNTNASSAAPR  
PAKPSAFPPPMYGGVTPGTGSLQPHGPYRTRL

>GRMZM2G062527P4

MYGGVTPGTGSLQPHGPYRTRL

>GRMZM2G062527P5

MYGGVTPGTGSLQPHECGGRCAERCSATAYQKPCLFFCRKCCAACLCVPPGTYGKNKNTCP  
CYNNWKTGRGPKCP

>GRMZM2G077034

MKPAATARVAGLLFFLVLLLALPSLRVSMAGSGFCDGKCAVRCSKASRHDDCLKYCGICC  
ATCNCVPSGTAGNKDECPCYRDMTTGHGNNRTRPKCP

>GRMZM2G164090

MAKASSRLLFSLSLVLLLLVETTTSPHGQADAIDCGASCSYRCSKSGRPKMCLRACGTC  
CQRCGCVPPGTSGNEDVCPCYANMKTHDGQHKCP

>GRMZM2G107003

MAPSKLAVVVALVASLLLLTTSNTKLGLFVLGQAAPGAYPPRAPPPHQIVDLAKDCGGAC  
DVRCGAHSRKNICTRACKCGVCRCVPAGTAGNQQTGKCYTDWTTGHNKTKCP

>GRMZM2G032198

MESGSKKVAAGVLVLLLLQLMVAPTTATARLLQADTSPVFGLDFIAREFGHPDGAISCGE  
SCVIIPCVSTLLGCRCEKLCVK

>GRMZM2G374405

MESGSKKVAACVLALLLQLMVAPTTATARLLQQADTSPVFGLDIIAREFGHPDGAVPCF  
ESCVFVPCISSVVGCRCENNVCK

>GRMZM2G450866

MAARSPRGAVPDGSLATTPKVTMLSATLCYTGETCKYITCLTPACSLHPRTIPLLLRRL  
LGLPDLDRSVKIPPAVKACILDDAVARDIGVGQPLSNGRSSLLRSRVGGERFLWACCSGS  
SSTTAGTSGIILTWHIATCILEVRHPYQCGGGGCQEQLNRHKIAATHLSRYCAYLMAWYP  
DLLPDHEEWSTALYETVKDDARRALAGCSAGCAAVLGPEAEYVSRPVIQSLSVYSRHEGL  
RKGVVLGKQLVELMEGEETAWMVLAEFWSEMILYVAASDIALHGVVS

>GRMZM2G430500

MAGRKCRAIPTAIATAVVVVAVLMAVAVAGVAAKDASGAPSSLTTWSAAGCSGDTSIVGS  
CGCTDLAFYAGQEFYYRGETATLYTGTGCTGTPYQVFEDTQACGDFGWRSINIDC
