# Supplementary figures and images for: Investigation of Antimicrobial Peptide Genes Associated with Fungus and Insect Resistance in Maize
Source: MDPI journal article supplement (doi:10.3390/ijms18091938), 2017-09-15

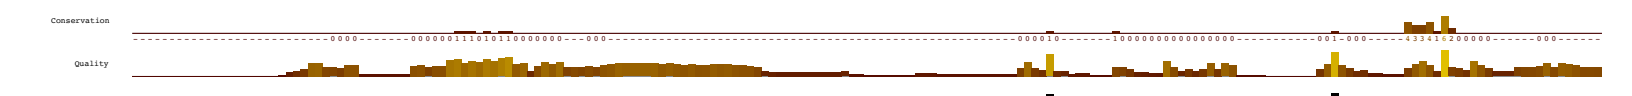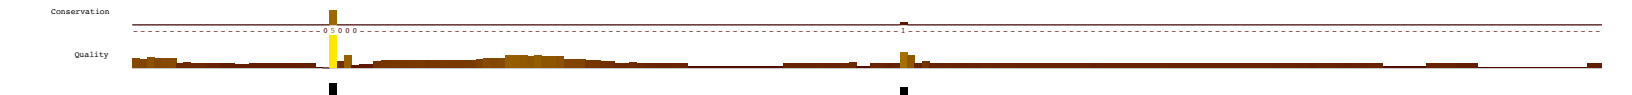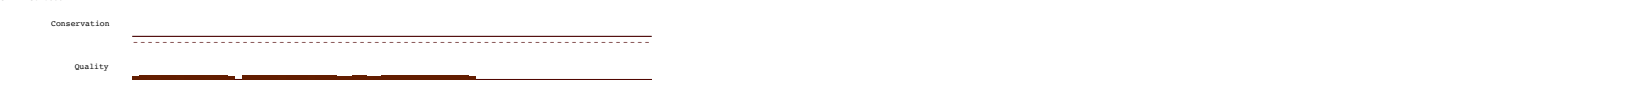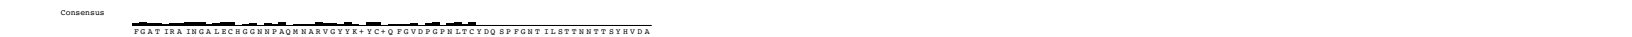

Supplement: s1 [file s1]
